# Supplementary material
Source: Springer Nature journal article supplement (https://www.springermedizin.de/resource/supplementary/12943_2013_1236_MOESM7_ESM.pdf/9552680)

**MLH1****SPTAN1****Lynch syndrome  
CRC  
(MLH1 deficient)**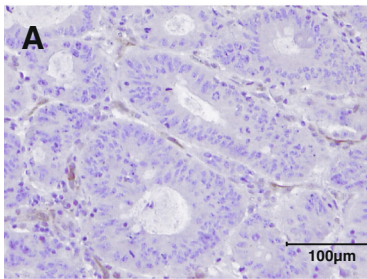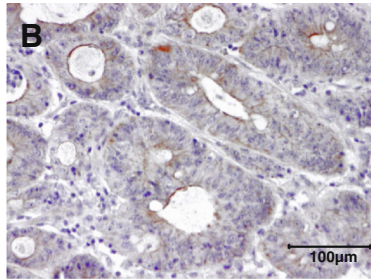**sporadic CRC  
(MLH1 proficient)**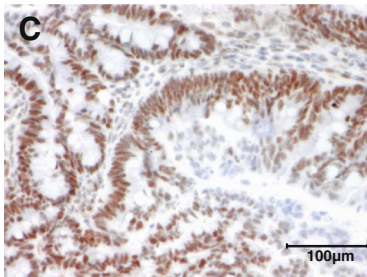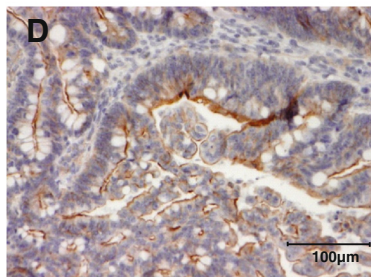**E**

1 2

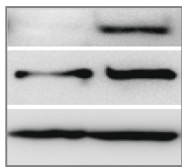

▲ MLH1

▲ SPTAN1

▲ beta-Actin

Supplement: MOESM7 [file 9552680]
